# Supplementary material for: Polydimethylsiloxane-assisted low-energy anodization: a fluoride-free tunable strategy for engineering porous TiO 2 films
Source: Royal Society of Chemistry journal article supplement (doi:10.1039/d5ta07910a), 2026-01-01
Supplement: d5ta07910a1.pdf [file d5ta07910a1.pdf]

Supporting Information

**Polydimethylsiloxane-Assisted Low-Energy Anodization: A Fluoride-Free  
Tunable Strategy for Engineering Porous TiO<sub>2</sub> Films**

*Hyerin Jeon<sup>a</sup>, Jaehyun Lee<sup>a</sup>, Jaebong Park<sup>b</sup>, Sunghwan Kim<sup>b</sup>, Jinhee Lee<sup>a\*</sup>, Jinsub Choi<sup>a\*</sup>*

<sup>a</sup>Department of Chemistry and Chemical Engineering,  
Inha University, 22212, Incheon, Republic of Korea

<sup>b</sup>Electrification PE Materials Development Team,  
Hyundai Motor Company, 445-706, Gyeonggi-do, Republic of Korea

\*To whom correspondence should be addressed

Tel.: +82-32-860-7476

E-mail: jinhee333@inha.ac.kr; jinsub@inha.ac.kr

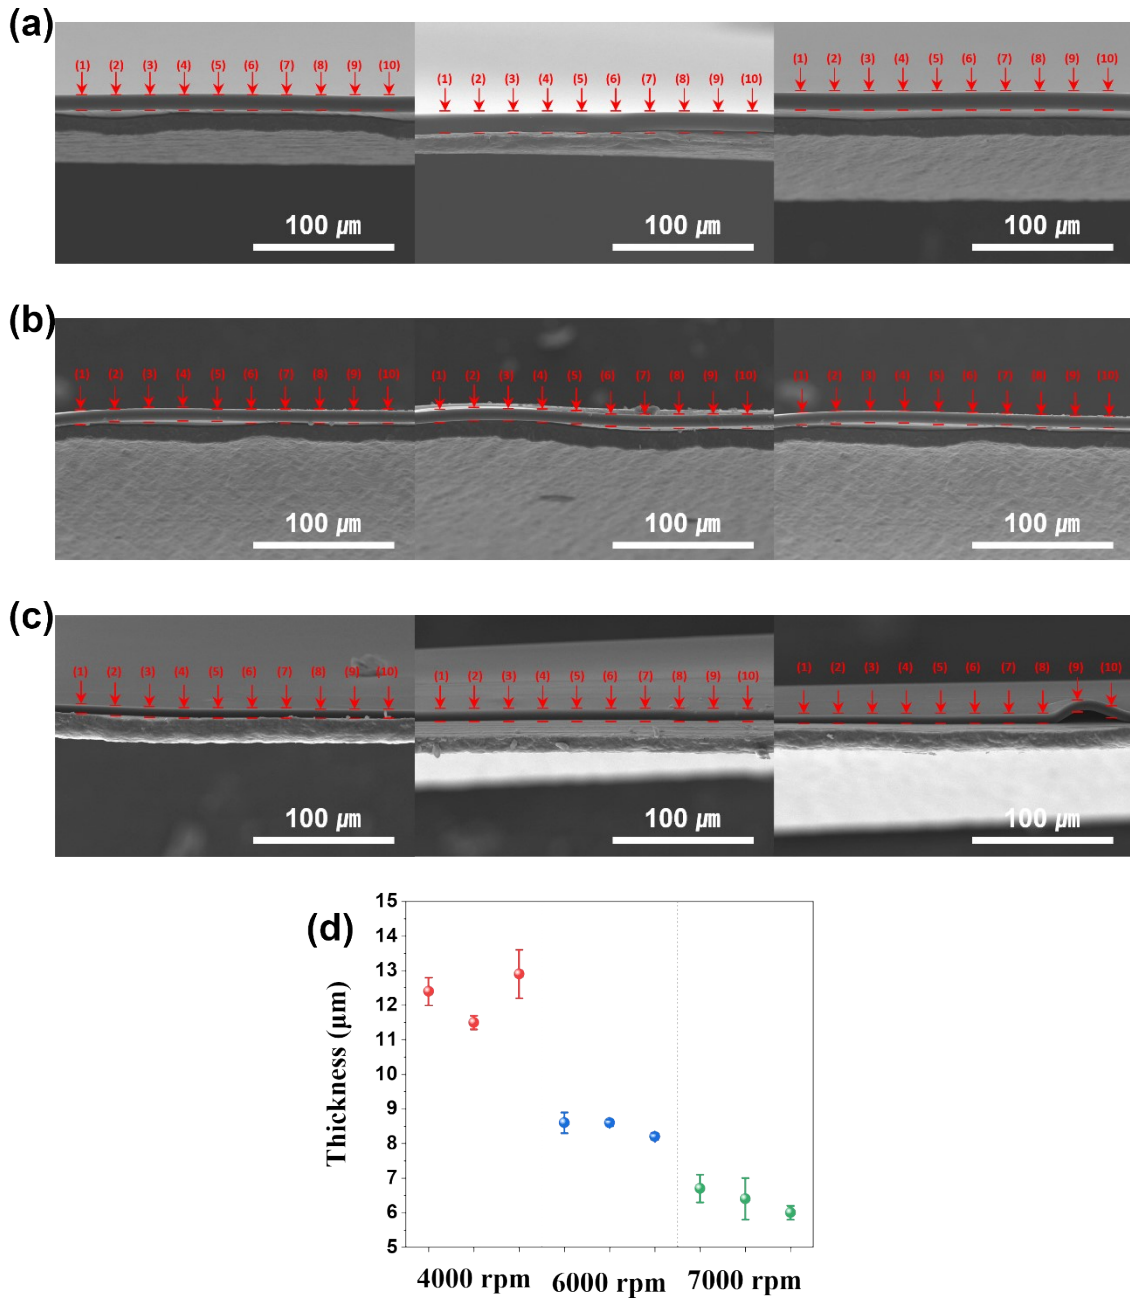

20

21 **Figure S1.** Cross-sectional SEM images of PDMS layers spin-coated on titanium substrates at  
 22 rotational speeds of (a) 4000 rpm, (b) 6000 rpm, and (c) 7000 rpm. (d) Thickness of PDMS  
 23 films prepared at spin speeds of 4000, 6000, and 7000 rpm. For each rotational speed, three  
 24 independent samples were examined, and the film thickness was measured at ten different  
 25 positions per sample.

26

27 **Table S1.** Numerical values of PDMS film thickness ( $\mu\text{m}$ ) measured from cross-sectional SEM  
 28 images at different spin-coating speeds (4000, 6000, and 7000 rpm).

| 4000 rpm                  |          |          | 6000 rpm                 |          |          | 7000 rpm                 |          |          |
|---------------------------|----------|----------|--------------------------|----------|----------|--------------------------|----------|----------|
| Sample 1                  | Sample 2 | Sample 3 | Sample 1                 | Sample 2 | Sample 3 | Sample 1                 | Sample 2 | Sample 3 |
| 12.0                      | 11.3     | 12.7     | 8.7                      | 8.5      | 8.3      | 6.4                      | 6.5      | 5.9      |
| 12.4                      | 11.3     | 12.3     | 8.5                      | 8.6      | 8.1      | 6.6                      | 6.5      | 5.9      |
| 12.6                      | 11.4     | 13.2     | 9.0                      | 8.7      | 8.2      | 6.8                      | 6.2      | 6.0      |
| 12.4                      | 11.6     | 13.7     | 8.6                      | 8.8      | 8.2      | 6.7                      | 6.2      | 6.0      |
| 12.6                      | 11.6     | 13.3     | 8.5                      | 8.6      | 8.2      | 7.0                      | 6.0      | 6.2      |
| 12.6                      | 11.7     | 13.1     | 8.5                      | 8.6      | 8.2      | 6.9                      | 6.9      | 6.1      |
| 12.4                      | 11.4     | 13.2     | 8.5                      | 8.5      | 8.2      | 6.8                      | 6.6      | 5.9      |
| 12.4                      | 11.3     | 12.5     | 8.7                      | 8.6      | 8.2      | 6.4                      | 6.5      | 6.0      |
| 12.4                      | 11.7     | 12.7     | 8.9                      | 8.6      | 8.3      | 7.0                      | 6.2      | 6.0      |
| 12.2                      | 11.6     | 12.6     | 8.6                      | 8.6      | 8.2      | 6.3                      | 5.9      | 5.8      |
| Average: $12.67 \pm 0.67$ |          |          | Average: $8.49 \pm 0.04$ |          |          | Average: $6.41 \pm 0.38$ |          |          |

29

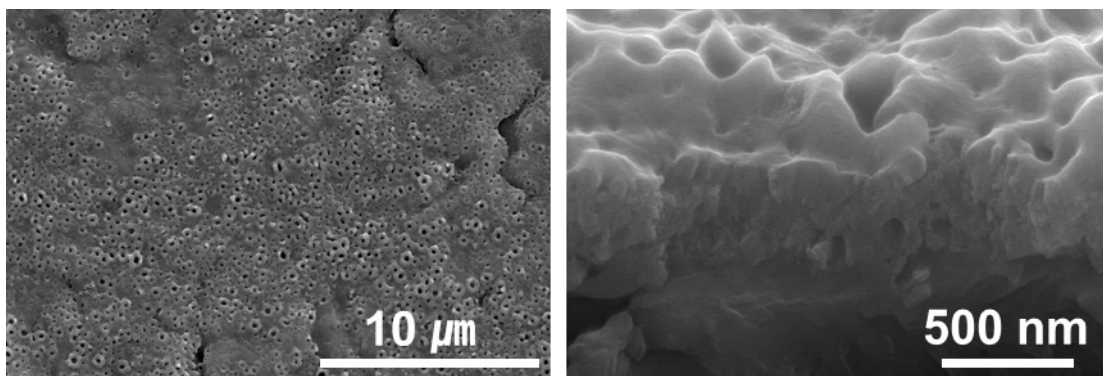

30

31 **Figure S2.** Top-view and cross-sectional SEM images of oxide layers formed on bare Ti pre-  
32 cathodic treated at  $100 \text{ mA cm}^{-2}$  for 10 min and anodized at 150 V for 30 min in 0.2 M  $\text{H}_2\text{SO}_4$ .

33

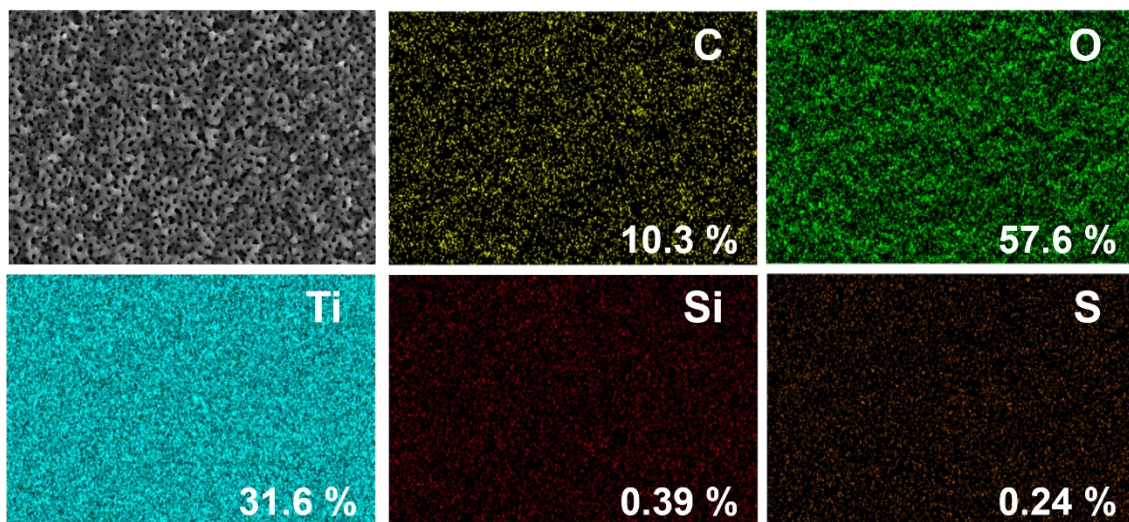

**Figure S3.** EDS elemental mapping and elemental composition of the oxide layer formed on PDMS-Ti anodized in 0.2 M H<sub>2</sub>SO<sub>4</sub> at 150 V for 30 min.

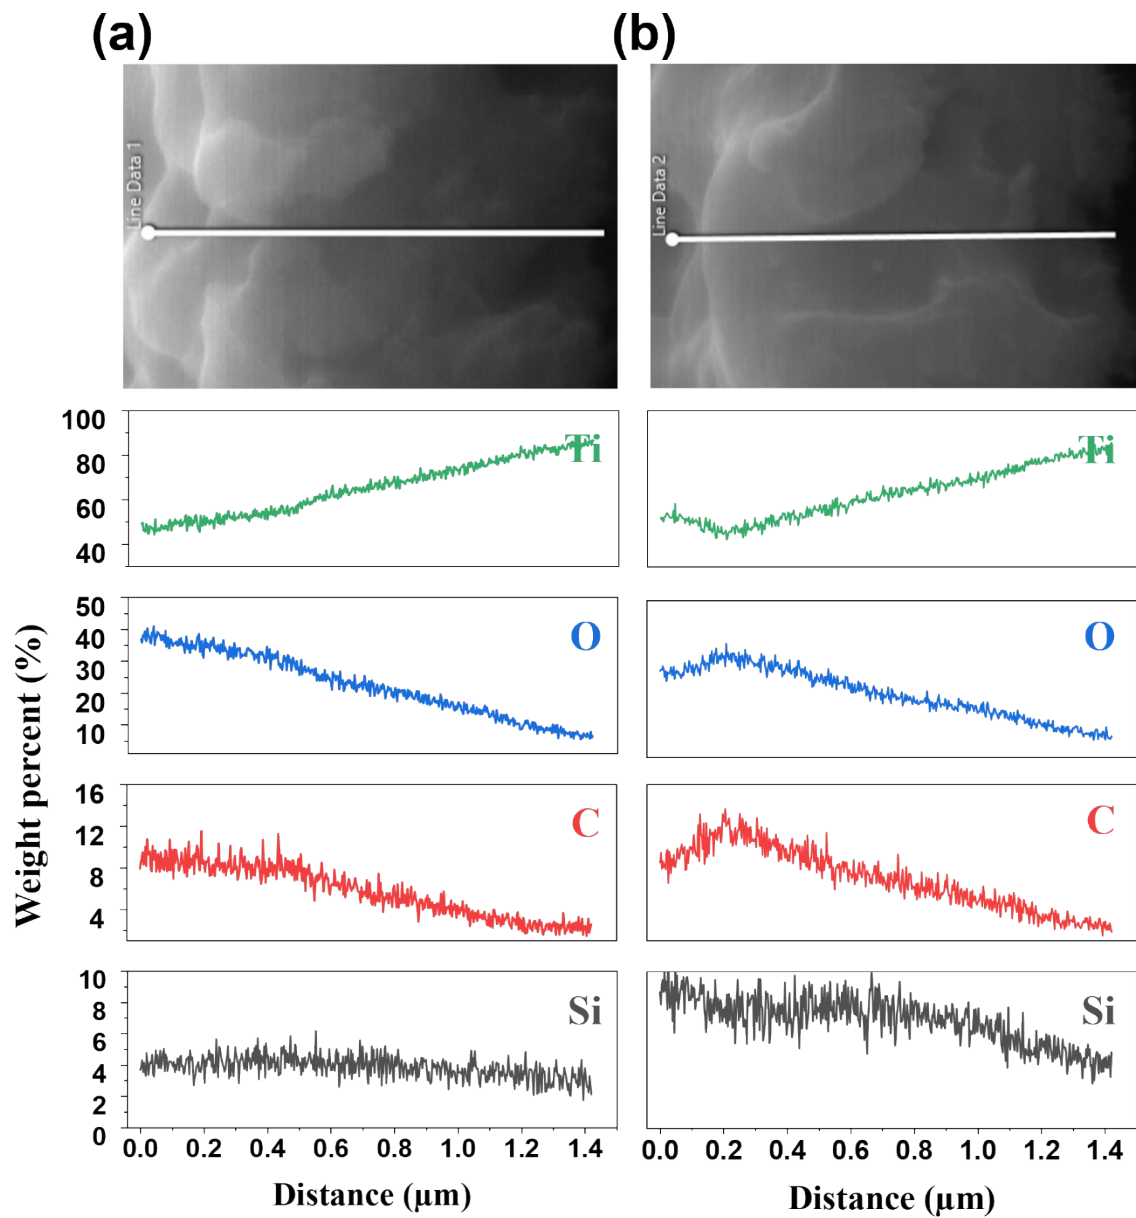

38

39 **Figure S4.** EDS line scanning of the oxide layer formed on PDMS-Ti anodized in (a) 0.2 M  
 40  $\text{H}_2\text{SO}_4$  and (b) mixed electrolyte of 0.2 M  $\text{H}_2\text{SO}_4$  and 0.4 M  $\text{Na}_2\text{SiO}_3$  at 150 V for 30 min.

41

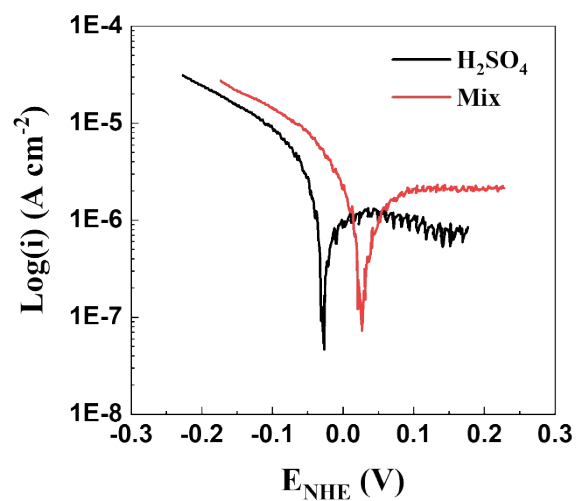

**Figure S5.** Tafel polarization curves of PDMS-Ti anodized at 150 V for 30min in 0.2 M  $\text{H}_2\text{SO}_4$  and a mixed electrolyte of 0.2 M  $\text{H}_2\text{SO}_4$  and 0.4 M  $\text{Na}_2\text{SiO}_3$ .

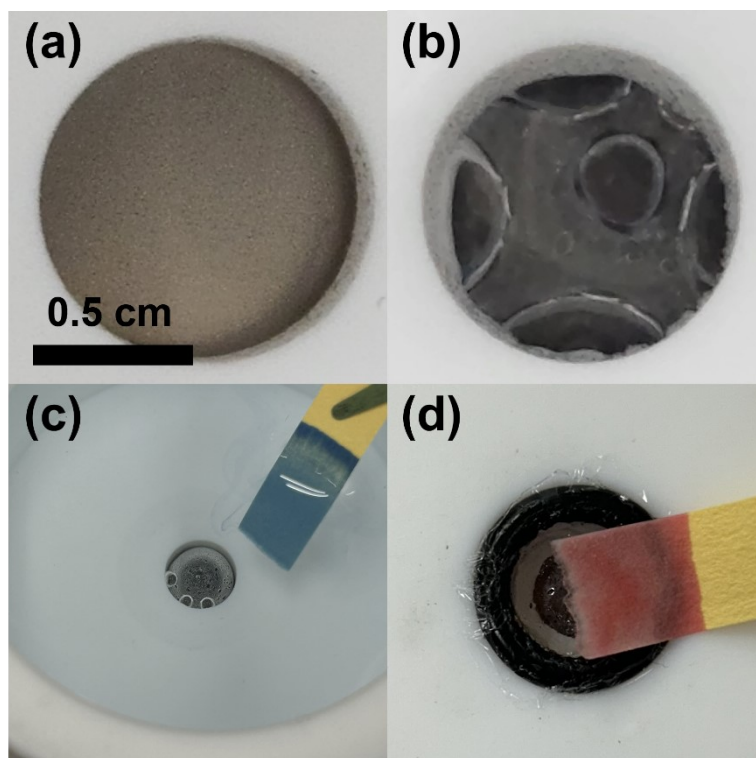

**Figure S6.** Surface images of the PDMS-Ti electrode (a) before and (b) after anodization. (c) pH indicators result for the electrolyte and (d) the localized pH inside the PDMS layer following anodization.



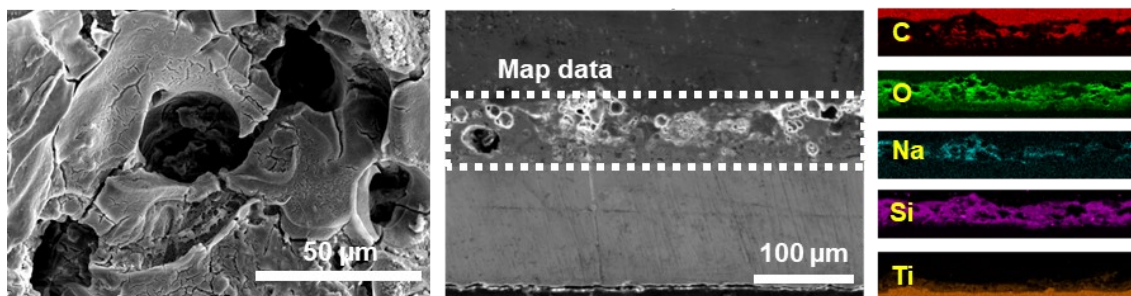

**Figure S7.** Top-view and cross-sectional SEM images of the oxide layer formed on PDMS-Ti after PEO treatment at 200 V, along with cross-sectional EDS elemental mapping confirming the elemental distribution within the oxide film (reproduced with permission from <sup>[1]</sup>).

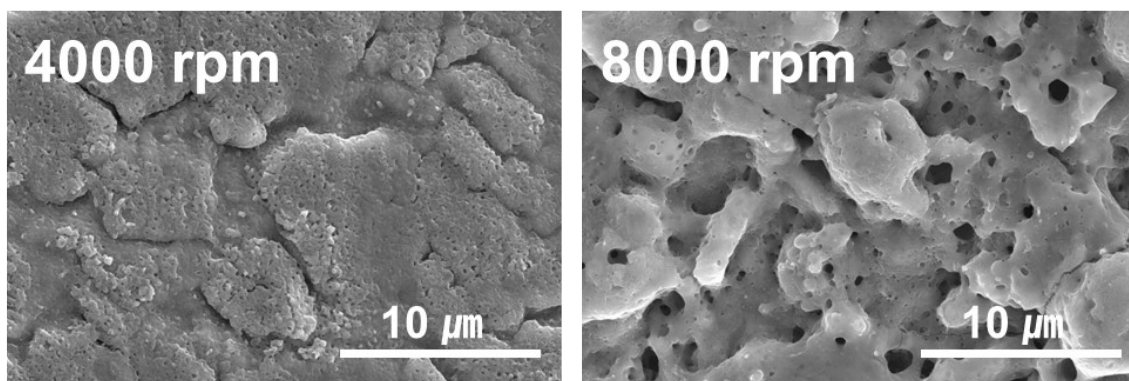

56

57 **Figure S8.** Top-view SEM images of oxide layers formed on PDMS-coated Ti, spin-coated at  
58 4000 and 8000 rpm, after anodization at 150 V for 30 min in a mixed electrolyte of 0.2 M  
59  $\text{H}_2\text{SO}_4$  and 0.4 M  $\text{Na}_2\text{SiO}_3$ .

60

100 s

300 s

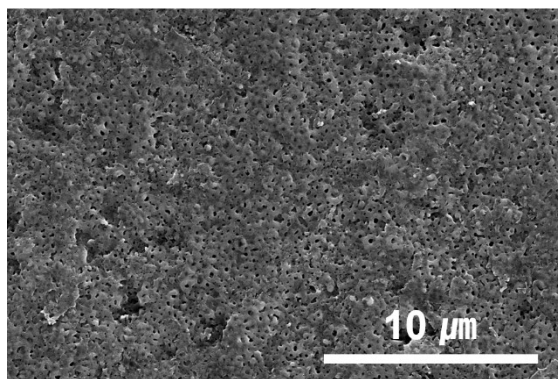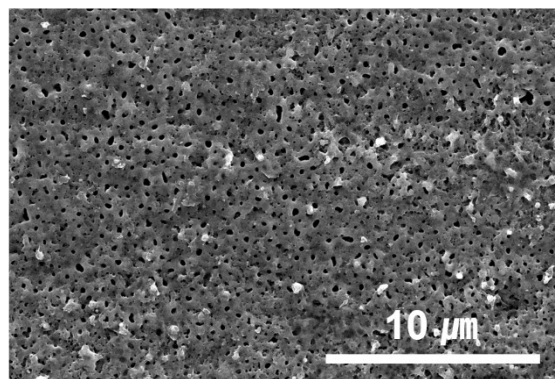

61

62 **Figure S9.** Top-view SEM images of oxide layers formed on PDMS-Ti anodized in 0.2 M  
63 H<sub>2</sub>SO<sub>4</sub> at 150 V for 100 s and 300 s.

64

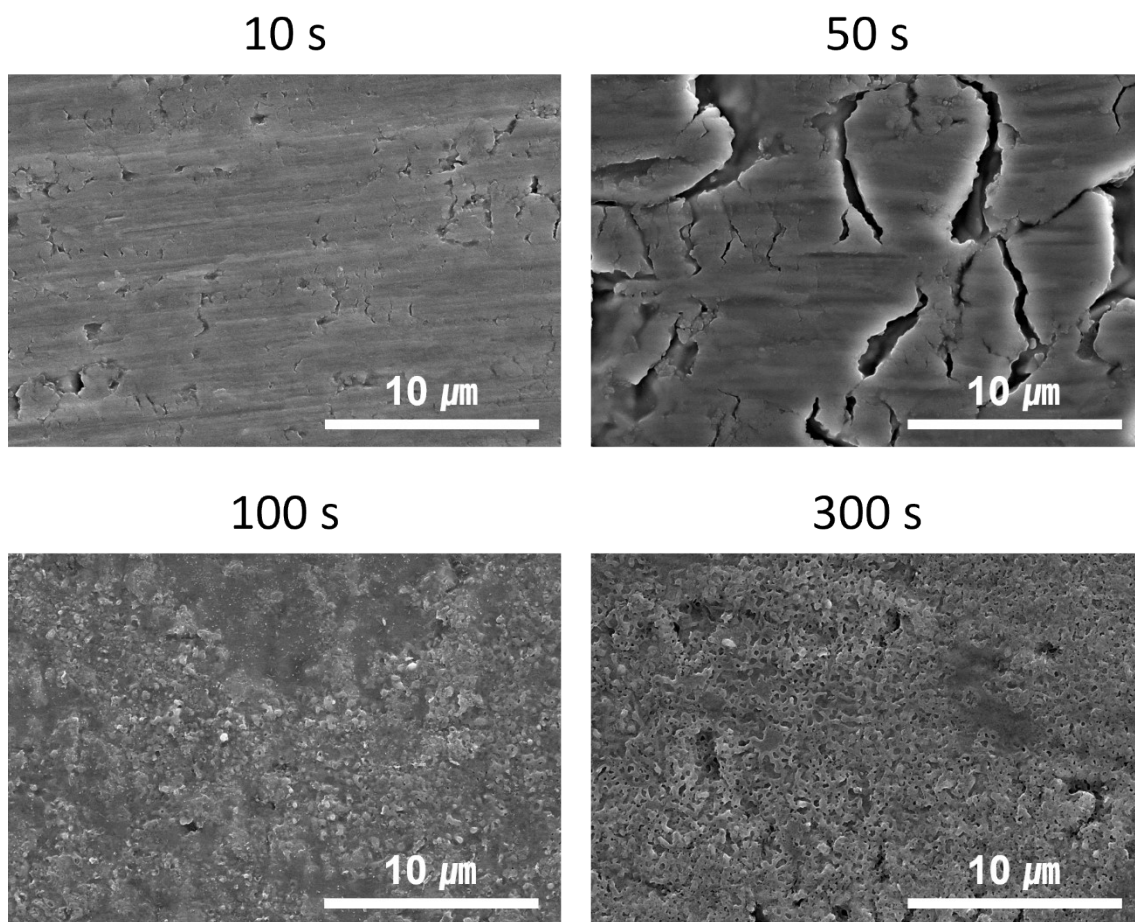

**Figure S10.** Top-view SEM images of oxide layers formed on PDMS-Ti anodized in mixed electrolyte of 0.2 M  $\text{H}_2\text{SO}_4$  and 0.4 M  $\text{Na}_2\text{SiO}_3$  at 150 V for 0, 10, 50, and 300 s.

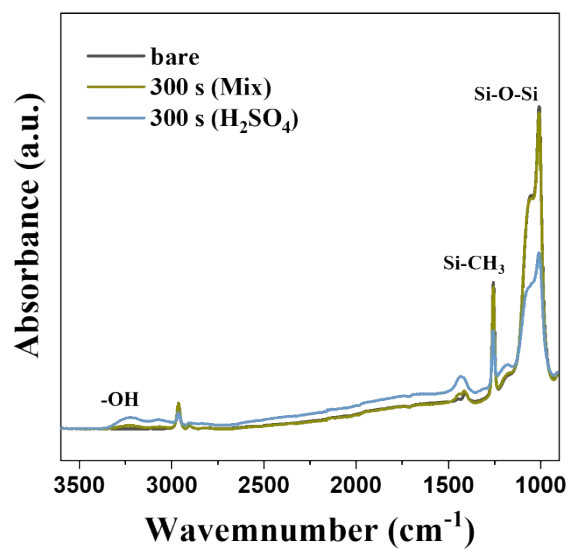

69

70 **Figure S11.** FT-IR spectra of the PDMS layer treated in 0.2 M  $\text{H}_2\text{SO}_4$  and mixed electrolyte  
 71 of 0.2 M  $\text{H}_2\text{SO}_4$  and 0.4 M  $\text{Na}_2\text{SiO}_3$  at 150 V for 300 s

72

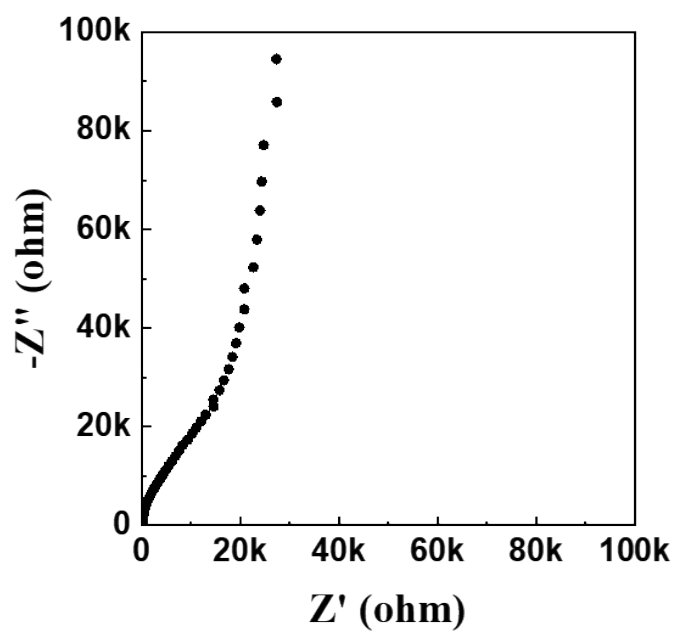

73

74 **Figure S12.** Nyquist plots of PDMS–Ti immersed in the mixed electrolyte for 30 min without  
 75 an applied voltage.

76

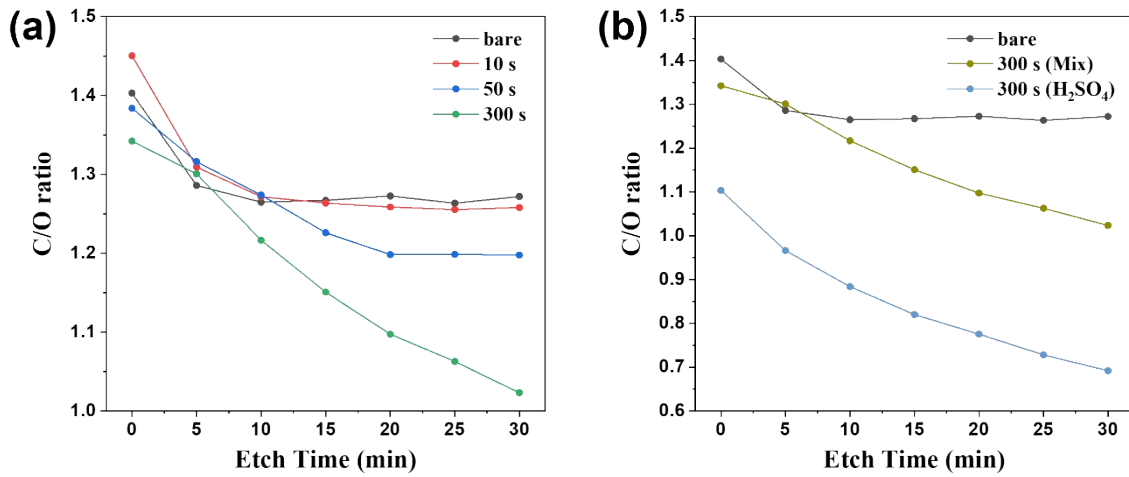

77

78 **Figure S13.** (a) C/O ratio depth profiles of PDMS layers treated at 150 V for 0, 10, 50, and  
 79 300 s in a mixed electrolyte containing 0.2 M  $H_2SO_4$  and 0.4 M  $Na_2SiO_3$ . (b) C/O ratio depth  
 80 profiles of PDMS layers treated at 150 V for 300 s in 0.2 M  $H_2SO_4$  and in a mixed electrolyte  
 81 containing 0.2 M  $H_2SO_4$  and 0.4 M  $Na_2SiO_3$ .

82

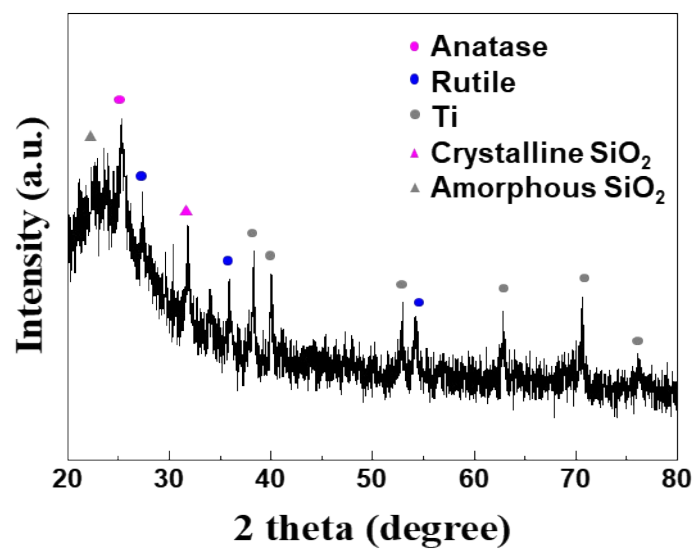

83

84 **Figure S14.** XRD pattern of PDMS-Ti after PEO treatment at 200 V (reproduced with  
 85 permission from <sup>[1]</sup>).

86



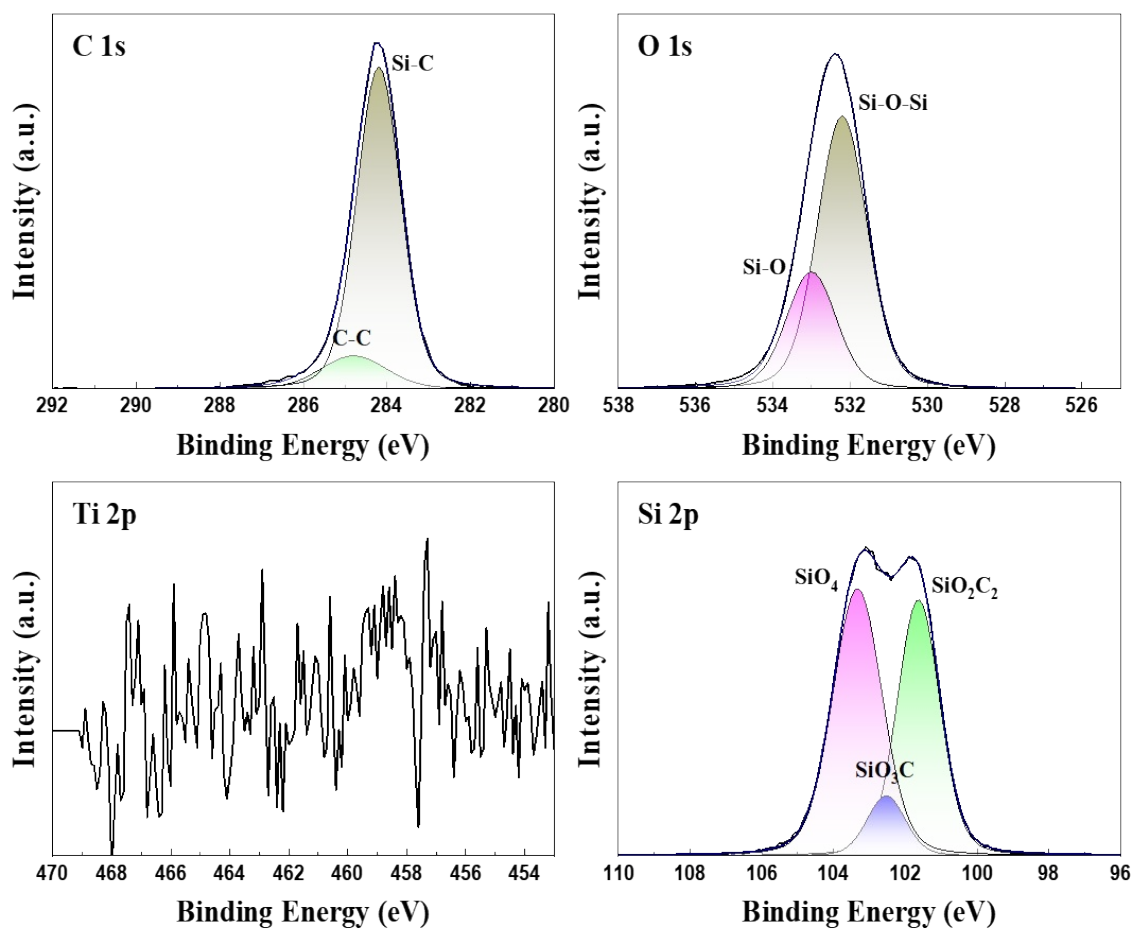

87

88 **Figure S15.** XPS spectra of C 1s, O 1s, Ti 2p, and Si 2P of PDMS-Ti after PEO treatment at  
 89 200 V (reproduced with permission from <sup>[1]</sup>).

90

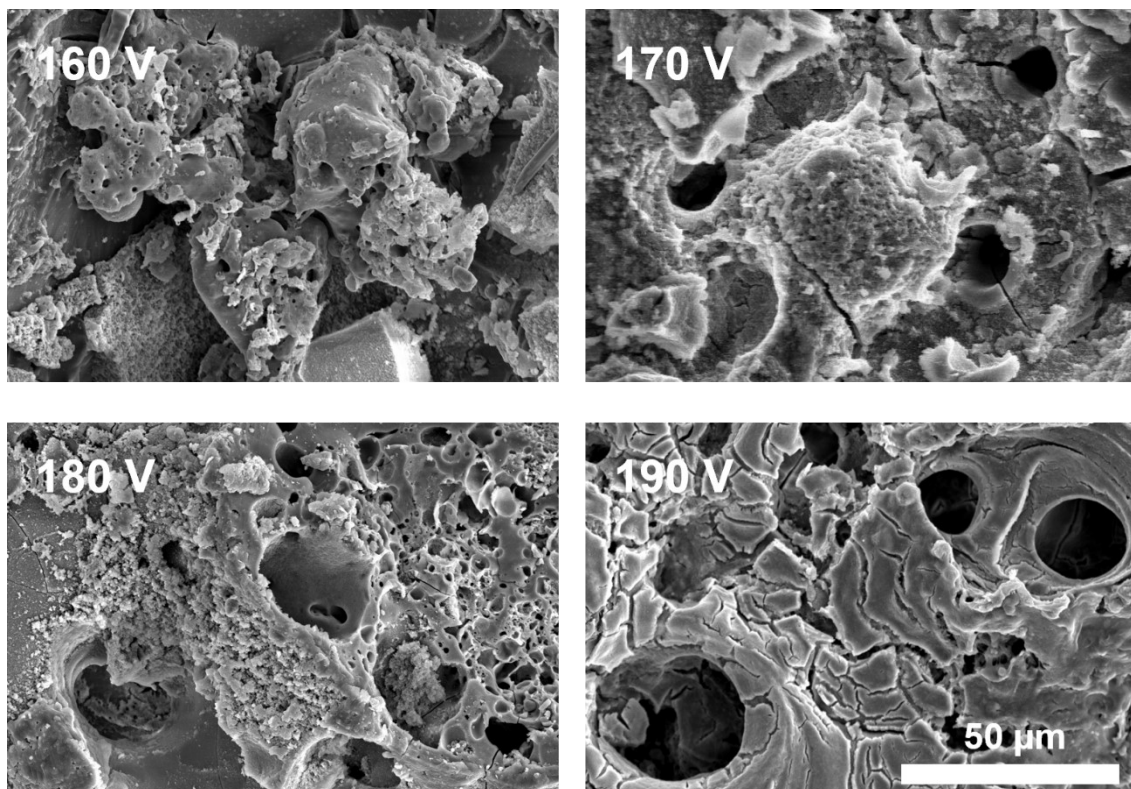

**Figure S16.** Top-view SEM images of PDMS-Ti after PEO treatment at voltages ranging from 160 V to 190 V.

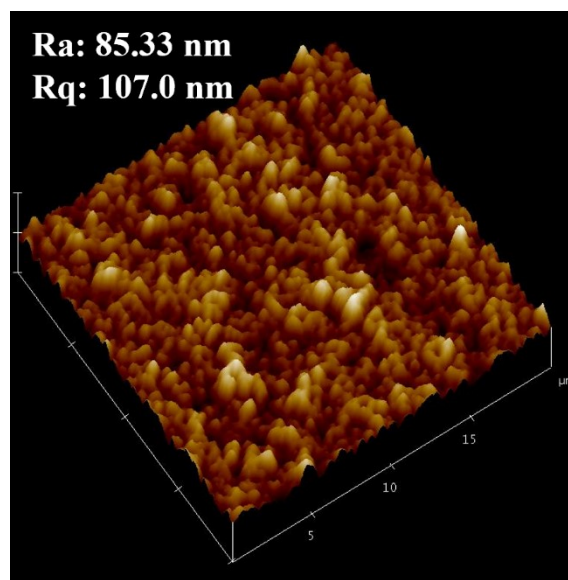

95

96 **Figure S17.** AFM surface morphology and roughness maps of oxide layers formed on PDMS-

97 Ti anodized in 0.2 M  $\text{H}_2\text{SO}_4$  at 150 V for 30 min.

98

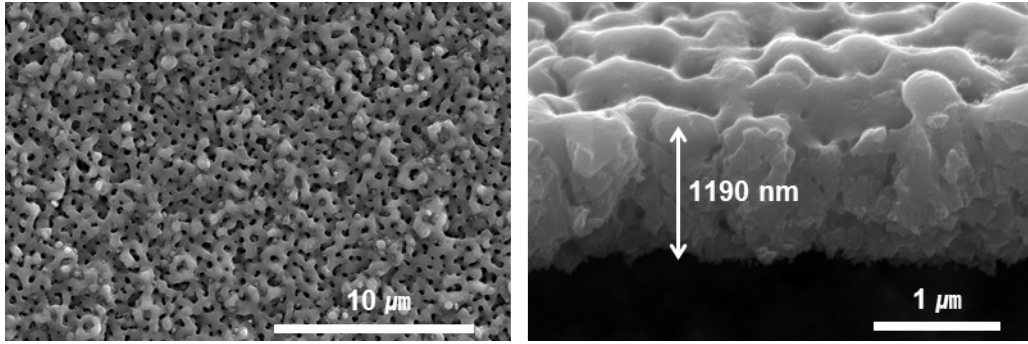

**Figure S18.** Top-view and cross-sectional SEM images of PDMS-Ti anodized at 150 V for 3 hr.

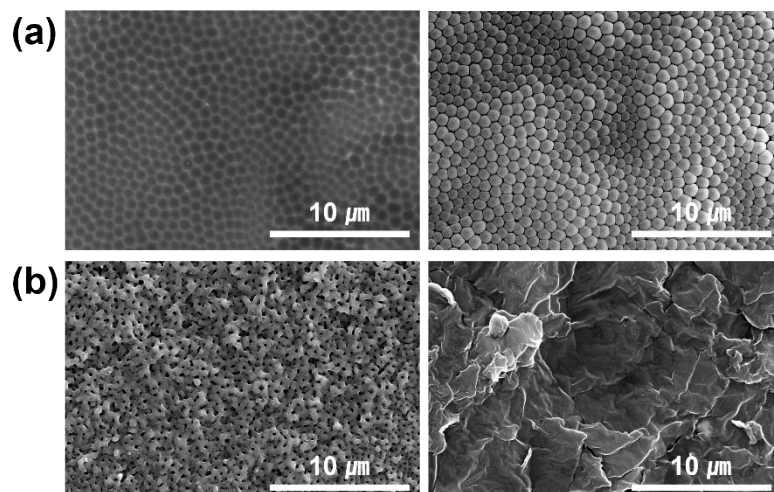

(c)

| Element (at%) | Tubular<br>(substrate) | Tubular<br>(tape) | PDMS-Ti<br>(tape) |
|---------------|------------------------|-------------------|-------------------|
| C             | 17.4                   | 17.42             | 92.59             |
| O             | -                      | 48.10             | 7.35              |
| F             | 1.29                   | 6.92              | -                 |
| Ti            | 81.31                  | 27.56             | 0.05              |

103

104 **Figure S19** Top-view SEM images of the substrate and tape surfaces after the tape test: (a)  
 105 bare Ti anodized at 60 V for 20 min in an ethylene-glycol-based electrolyte containing 0.3 wt%  
 106  $\text{NH}_4\text{F}$  and 7.5 wt% DI water, and (b) PDMS-Ti anodized at 150 V for 30 min in an electrolyte  
 107 containing 0.2 M  $\text{H}_2\text{SO}_4$  and 0.4 M  $\text{Na}_2\text{SiO}_3$ . (c) Atomic percentages of C, O, F, and Ti for  
 108 each sample obtained from EDX analysis.

109

110 **References**

1. 111 H.-G. Gim, Y.-T. Kim and J. Choi, *Electrochem. Commun.*, 2023, **148**, 107455.

112
